# Supplementary material
Source: publisher figshare collection journal article supplement (https://karger.figshare.com/ndownloader/files/25659458)
Supplement: Supplementary file 1 [file 25659458]

**Supplemental Figure 4.**


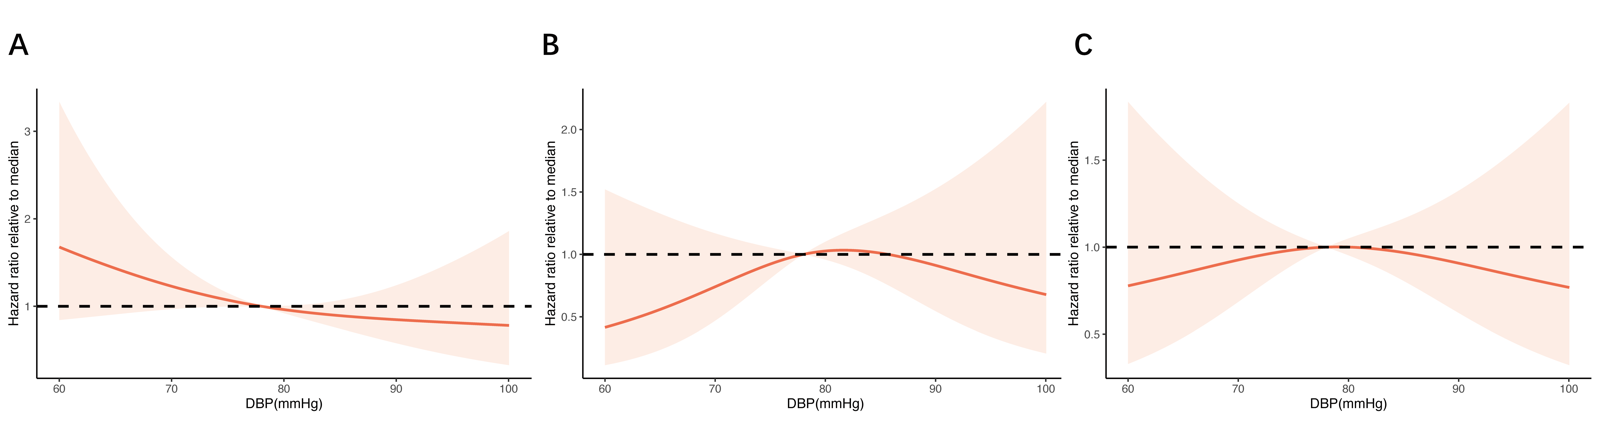


**Supplemental Fig. 4.** Nonlinear Cox regression analysis using penalized smoothing splines for association of diastolic blood pressure with (A)all-cause mortality, (B)cardiovascular mortality, (C)cardiovascular events. The hazard ratio is represented by the solid line and the 95% CI by the shaded area. There are no co-relations between DBP and all-cause mortality, cardiovascular mortality and cardiovascular events. Abbreviation: DBP, diastolic blood pressure.
